# Supplementary material for: Give Them a Toy or Increase Time out of Kennel at Lawn Areas: What Is the Influence of These Interventions on Police Dogs’ Welfare?
Source: MDPI journal article supplement (doi:10.3390/ani11082264), 2021-07-30
Supplement: s1 [file s1]

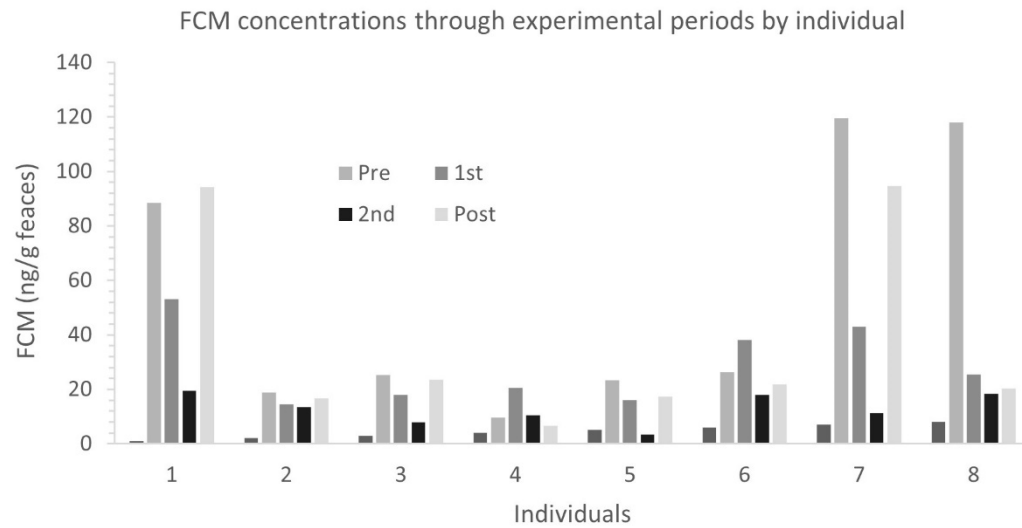

**Figure S1.** Graph presenting the concentrations of FCM by individual (numbers indicated on Table 1) in our four experimental periods (Pre: pre-interventions; 1st: first intervention; 2nd: second intervention; Post: post-interventions).
